# Supplementary material
Source: publisher site journal article supplement (https://mbmg.pensoft.net/article/download/suppl/4027107/)
Supplement: Supplementary file 1

Analysis of proportion of ITS2 and rbcL contigs identifiable to species.

Carried out in R v 3.3.3. Levene’s test uses the package ‘car’, John Fox and Sanford Weisberg (2011). An {R} Companion to Applied Regression, Second Edition. Thousand Oaks CA: Sage. URL: http://socserv.socsci.mcmaster.ca/jfox/Books/Companion

ITS2

Shapiro-Wilk normality tests

Dorper: W = 0.72473, p-value = 0.004275

Goat: W = 0.74173, p-value = 0.01039

Merino: W = 0.84815, p-value = 0.0711

Kruskal-Wallis rank sum test

chi-squared = 0.3272, df = 2, p-value = 0.8491

rbcL

Shapiro-Wilk normality tests

Dorper: W = 0.91165, p-value = 0.3658

Merino: W = 0.92995, p-value = 0.4809

Goat: W = 0.87031, p-value = 0.1868

Levene's Test for Homogeneity of Variance (center = median)

Df F value Pr(>F)

group 2 1.1633 0.3318

Residuals 21
